# Supplementary material for: Sero-diagnosis of Active Mycobacterium tuberculosis Disease among HIV Co-infected Persons using Thymidylate Kinase based Antigen and Antibody Capture Enzyme Immuno-Assays
Source: PubMed Central journal article supplement (PMC5573238; doi:10.4172/2161-1068.1000241), 2017-05-31
Supplement: NIHMS896424-supplement-Suppl_2.pdf [file NIHMS896424-supplement-Suppl_2.pdf]

# Certificate of Analysis

**Order Number:** 520141-4

**Protein Name:** Thymidylate kinase

**Shipping Conditions:** Dry Ice

**Lot Number:** 520141S04/P20011412

## INDEX

|                                         |   |
|-----------------------------------------|---|
| <b>Certificate of Analysis</b> .....    | 3 |
| SDS-PAGE Analysis.....                  | 4 |
| Quantification--BSA Standard Curve..... | 4 |
| <b>Packing List</b> .....               | 5 |
| <b>Appendix</b> .....                   | 6 |
| DNA Sequence.....                       | 6 |
| Derived Protein Sequence.....           | 7 |
| General procedure.....                  | 8 |

## Certificate of Analysis

**Order Number:** 520141-4  
**Protein Name:** Thymidylate kinase  
**Shipping Conditions:** Dry Ice  
**Lot Number:** 520141S04/P20011412

---

**Expression System:** *E.coli*  
**Purification:** Protein was obtained from inclusion bodies

---

**Package:** 5.00 mg. 1.00 ml/tube, 5 tubes  
**Concentration:** 1 mg/ml, as determined by Bradford protein assay with BSA as a standard  
**Purity:** About 85% as estimated by densitometric analysis of the Coomassie Blue-stained SDS-PAGE gel  
**Sterility:** Sterilized via a 0.22 µm filter and packaged aseptically  
**Storage and Handling:** Store at -80°C. Aliquots should be stored at the same temperature after first use to avoid multiple freeze-thaws  
**Storage Buffer:** 50 mM Tris-HCl, 150 mM NaCl, 10% Glycerol, 500 mM L-Arginine, pH 8.0

**SDS-PAGE Analysis:**

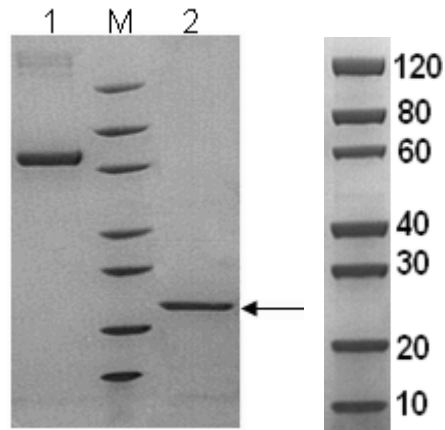

**Fig.1 SDS-PAGE analysis**

Lane 1: BSA (2.00 µg)

Lane 2: Thymidylate kinase (2.00 µg)

The SDS-PAGE was run on 4%~20% gradient gel, followed by Coomassie Blue staining  
Protein Marker M: GenScript, Cat. No. M00516

**Quantification--BSA Standard Curve:**

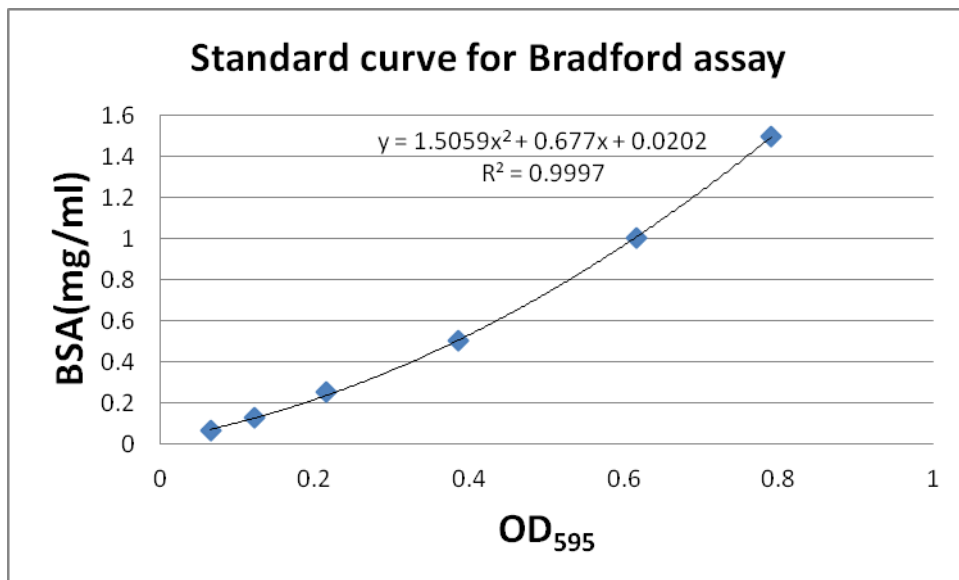

| Sample             | Abs at 595 nm(diluted 2 times) | Protein (mg/ml) |
|--------------------|--------------------------------|-----------------|
| Thymidylate kinase | 0.383                          | 1 mg/ml         |

## Packing List of 520141-4

**Protein (Store at -80°C)**

**Protein name:** Thymidylate kinase

tag free

**Purity:** >85%

**Concentration:** 1 mg/ml

**Total:** 5.00 mg. 1.00 ml/tube, 5 tubes

Certified by: *Bellu* Date: 12/29/2014

## Appendix

### DNA Sequence (Sequencing Confirmed):

|     |            |            |            |            |            |            |
|-----|------------|------------|------------|------------|------------|------------|
| 1   | ATGCTGATTG | CTATTGAAGG | TGTTGATGGT | GCTGGTAAAC | GTACGCTGGT | TGAAAAACTG |
| 61  | TCTGGTGCTT | TCCGTGCGGC | GGGTCGTAGC | GTGGCTACCC | TGGCGTTTCC | GCGCTATGGC |
| 121 | CAGAGTGTTG | CGGCCGATAT | TGCAGCTGAA | GCCCTGCATG | GCGAACACGG | TGACCTGGCA |
| 181 | AGCTCTGTCT | ATGCTATGGC | AACCCTGTTC | GCACTGGATC | GTGCAGGTGC | AGTGCATACG |
| 241 | ATTCAGGGCC | TGTGCCGCGG | TTACGATGTG | GTTATCCTGG | ACCGTTATGT | TGCCAGTAAC |
| 301 | GCGGCCTACT | CCGCAGCTCG | TCTGCACGAA | AATGCAGCCG | GTAAAGCAGC | TGCATGGGTC |
| 361 | CAGCGCATCG | AATTTGCGCG | TCTGGGTCTG | CCGAAACCGG | ATTGGCAAGT | TCTGCTGGCC |
| 421 | GTCTCAGCAG | AACTGGCTGG | TGAACGTTCC | CGTGGTCGTG | CACAGCGTGA | CCCGGGTCGT |
| 481 | GCTCGTGATA | ACTATGAACG | CGACGCGGAA | CTGCAGCAAC | GTACGGGTGC | AGTGTACGCA |
| 541 | GAATGGCAG  | CACAAGGTTG | GGGCGGTCGT | TGGCTGGTCG | TGGGTGCTGA | TGTGGACCCG |
| 601 | GGCCGTCTGG | CTGCAACCCT | GGTCCGCCG  | GATGTGCCGT | CG         |            |

**Derived Protein Sequence:**

| Theoretical Isoelectric Point | Theoretical Molecular Weight |
|-------------------------------|------------------------------|
| 7.66                          | 22635.0 Da                   |

1 MLIAIEGVDG AGKRTLVEKL SGAFRAAGRS VATLAFPRYG QSVAADIAAE ALHGEHGDLA  
61 SSVYAMATLF ALDRAGAVHT IQGLCRGYDV VILDRYVASN AAYSAARLHE NAAGKAAAWV  
121 QRIEFARLGL PKPDWQVLLA VSAELAGERS RGRAQRDPGR ARDNYERDAE LQRTGAVYA  
181 ELAAQGWGGR WLVVGADVDP GRLAATLAPP DVPS

### **1. Gene Synthesis and Subcloning:**

After customer's approval, target DNA sequence 520141-4(Thymidylate kinase) was designed, synthesized with related tags for each construct to facilitate the purification. The complete sequence was subcloned into target vectors for *E. coli* expression.

### **2. Expression Evaluation:**

*E. coli* BL21 (DE3) was transformed with recombinant plasmids. A single colony was inoculated into medium containing ampicillin or kanamycin; cultures were incubated in 37 °C at 200 rpm. IPTG was introduced for induction. SDS-PAGE was used to monitor the expression.

### **3. Purification and Analysis:**

Cells were harvested by centrifugation. Cell pellets were lysed by sonication, and then precipitate after centrifugation was dissolved using urea. Fractions were pooled and refolded followed by 0.22 µm filter sterilization. Proteins were analyzed by MALDI-TOF and SDS-PAGE by using standard protocols for molecular weight and purity measurements. The concentration was determined by Bradford protein assay with BSA as a standard.



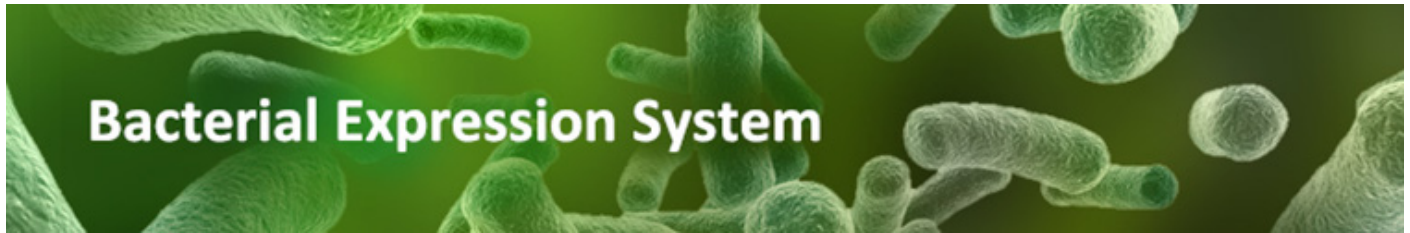

### BacPower™ Guaranteed Package

- Gene synthesis is included in the package – no additional cost to you
- Guarantees the amount of custom protein – no cost to you if project fails\*
- Guarantees the purity of custom protein – no cost to you if desired purity is not achieved\*
- Fast turnaround time - as little as 6 weeks

For more details, please visit [http://www.genscript.com/guaranteed\\_package\\_promotion.html](http://www.genscript.com/guaranteed_package_promotion.html)

### BacPower™ Customized Protein Service

- Flexible and affordable service tailored to meet your demands
- Fast turnaround - as little as 4 weeks to get your purified proteins
- State-of-the-art technologies - OptimumGene™ gene design& codon optimization software, BacPower™ bacterial expression system, and FoldArt™ protein refolding technology
- One-stop service platform from gene synthesis, cloning, protein expression to antibody production, structure biology and assay development

For more details, please visit [http://www.genscript.com/bacterial\\_protein\\_customized\\_service.html](http://www.genscript.com/bacterial_protein_customized_service.html)

### Fast gene-to-protein™

- Guarantees 3 mg of custom protein
- Guarantees 75% or 85% purity of custom protein
- Fastest turnaround - as little as 4 weeks from sequence to purified protein

For more details, please visit [http://www.genscript.com/fast\\_gene\\_to\\_protein.html](http://www.genscript.com/fast_gene_to_protein.html)

**We also provide high capacity fermentation [2000L] service for your large scale protein production needs.**

\*Certain rules may apply, please check our website for details

For research use only

**860 Centennial Ave., Piscataway, NJ 08854, USA**

Toll-Free: 1-877-436-7274 Tel: 1-732-885-9188 Fax: 1-732-210-0262 Email: [order@genscript.com](mailto:order@genscript.com) Web: [www.genscript.com](http://www.genscript.com)
