# Supplementary material for: Sero-diagnosis of Active Mycobacterium tuberculosis Disease among HIV Co-infected Persons using Thymidylate Kinase based Antigen and Antibody Capture Enzyme Immuno-Assays
Source: PubMed Central journal article supplement (PMC5573238; doi:10.4172/2161-1068.1000241), 2017-05-31
Supplement: NIHMS896424-supplement-Suppl_3.pdf [file NIHMS896424-supplement-Suppl_3.pdf]

**BLAST®**

**Basic Local Alignment Search Tool**

NCBI/ [BLAST](#)/ [Microbes](#)/ [Formatting Results - 0V0XK1R5015](#)

[Formatting options](#)

[Download](#)

[Blast report description](#)

**Protein Sequence (27 letters)**

**RID** [0V0XK1R5015](#) (Expires on 09-09 18:23 pm)

**Query ID** Icl|71609

**Description** None

**Molecule type** amino acid

**Query Length** 27

**Database Name** Microbial proteins

**Description** **Program**BLASTP 2.2.29+

**New** DELTA-BLAST, a more sensitiv

**Graphic Summary**

Putative conserved domains have been detected, click on the image below for detailed results.

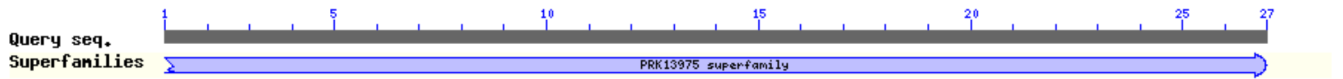

**Distribution of 100 Blast Hits on the Query Sequence**

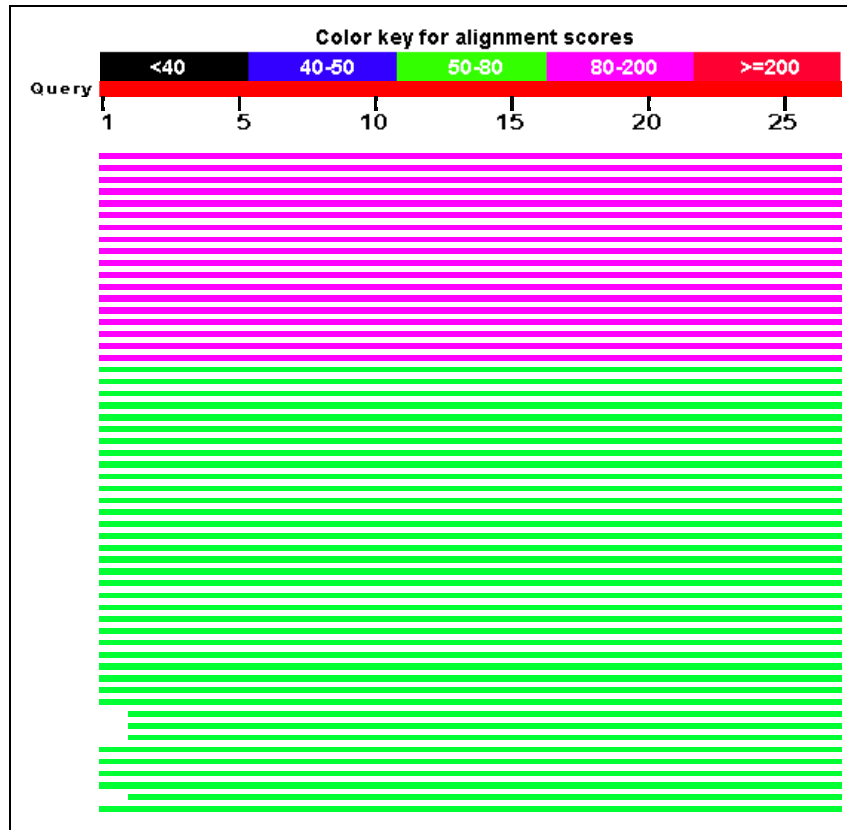

**Descriptions**

Sequences producing significant alignments:

| Description                                                                                            | Max score | Total score | Query cover | E value | Ident | Accession                      |
|--------------------------------------------------------------------------------------------------------|-----------|-------------|-------------|---------|-------|--------------------------------|
| thymidylate kinase Tmk [Mycobacterium tuberculosis UT0124]                                             | 90.1      | 90.1        | 100%        | 5e-20   | 100%  | <a href="#">KBM28427.1</a>     |
| thymidylate kinase [Mycobacterium tuberculosis]                                                        | 90.1      | 90.1        | 100%        | 3e-19   | 100%  | <a href="#">AIH62975.1</a>     |
| thymidylate kinase [Mycobacterium tuberculosis]                                                        | 90.1      | 90.1        | 100%        | 3e-19   | 100%  | <a href="#">AIH98343.1</a>     |
| thymidylate kinase [Mycobacterium bovis]                                                               | 90.1      | 90.1        | 100%        | 3e-19   | 100%  | <a href="#">WP_024459054.1</a> |
| thymidylate kinase [Mycobacterium tuberculosis]                                                        | 90.1      | 90.1        | 100%        | 4e-19   | 100%  | <a href="#">AIH23782.1</a>     |
| thymidylate kinase [Mycobacterium tuberculosis]                                                        | 90.1      | 90.1        | 100%        | 4e-19   | 100%  | <a href="#">WP_003904223.1</a> |
| thymidylate kinase Tmk [Mycobacterium tuberculosis BTB11-133]                                          | 90.1      | 90.1        | 100%        | 4e-19   | 100%  | <a href="#">KCQ37814.1</a>     |
| thymidylate kinase Tmk [Mycobacterium tuberculosis BTB07-206]                                          | 90.1      | 90.1        | 100%        | 4e-19   | 100%  | <a href="#">KCN91622.1</a>     |
| thymidylate kinase Tmk [Mycobacterium tuberculosis M1520]                                              | 90.1      | 90.1        | 100%        | 4e-19   | 100%  | <a href="#">KBA42335.1</a>     |
| thymidylate kinase Tmk [Mycobacterium tuberculosis M1461]                                              | 90.1      | 90.1        | 100%        | 4e-19   | 100%  | <a href="#">KBA29358.1</a>     |
| thymidylate kinase Tmk [Mycobacterium tuberculosis M1417]                                              | 90.1      | 90.1        | 100%        | 4e-19   | 100%  | <a href="#">KAZ51277.1</a>     |
| MULTISPECIES: thymidylate kinase [Mycobacterium tuberculosis complex]                                  | 90.1      | 90.1        | 100%        | 4e-19   | 100%  | <a href="#">WP_003417036.1</a> |
| Putative thymidylate kinase Tmk (dTMP kinase) (thymidylic acid kinase) (TMPK) [Mycobacterium canettii] | 90.1      | 90.1        | 100%        | 4e-19   | 100%  | <a href="#">WP_015294285.1</a> |
| Putative thymidylate kinase Tmk (dTMP kinase) (thymidylic acid kinase) (TMPK) [Mycobacterium canettii] | 90.1      | 90.1        | 100%        | 4e-19   | 100%  | <a href="#">WP_015291311.1</a> |
| Putative thymidylate kinase Tmk (dTMP kinase) (thymidylic acid kinase) (TMPK) [Mycobacterium canettii] | 90.1      | 90.1        | 100%        | 4e-19   | 100%  | <a href="#">WP_015303784.1</a> |
| thymidylate kinase [Mycobacterium tuberculosis]                                                        | 90.1      | 90.1        | 100%        | 4e-19   | 100%  | <a href="#">WP_015456493.1</a> |
| thymidylate kinase [Mycobacterium canettii]                                                            | 90.1      | 90.1        | 100%        | 4e-19   | 100%  | <a href="#">WP_014001640.1</a> |
| thymidylate kinase [Mycobacterium tuberculosis]                                                        | 87.6      | 87.6        | 100%        | 3e-18   | 96%   | <a href="#">WP_024748275.1</a> |
| hypothetical protein [Mycobacterium avium]                                                             | 64.3      | 64.3        | 100%        | 7e-11   | 74%   | <a href="#">WP_023877133.1</a> |
| Thymidylate kinase [Mycobacterium marinum]                                                             | 65.5      | 65.5        | 100%        | 1e-10   | 78%   | <a href="#">WP_020727270.1</a> |
| Thymidylate kinase [Mycobacterium sp. 012931]                                                          | 65.5      | 65.5        | 100%        | 1e-10   | 78%   | <a href="#">WP_020788368.1</a> |
| thymidylate kinase Tmk [Mycobacterium liflandii]                                                       | 65.5      | 65.5        | 100%        | 1e-10   | 78%   | <a href="#">WP_015354855.1</a> |
| thymidylate kinase [Mycobacterium marinum]                                                             | 65.5      | 65.5        | 100%        | 1e-10   | 78%   | <a href="#">WP_012393166.1</a> |
| thymidylate kinase [Mycobacterium ulcerans]                                                            | 65.5      | 65.5        | 100%        | 1e-10   | 78%   | <a href="#">WP_011740536.1</a> |
| thymidylate kinase [Mycobacterium kansasii 732]                                                        | 64.7      | 64.7        | 100%        | 2e-10   | 74%   | <a href="#">EUA14516.1</a>     |
| thymidylate kinase [Mycobacterium sp. TKK-01-0059]                                                     | 64.3      | 64.3        | 100%        | 3e-10   | 74%   | <a href="#">KEF99753.1</a>     |
| thymidylate kinase [Mycobacterium avium subsp. hominissuis 3388]                                       | 64.3      | 64.3        | 100%        | 3e-10   | 74%   | <a href="#">KDO94907.1</a>     |
| thymidylate kinase [Mycobacterium avium]                                                               | 64.3      | 64.3        | 100%        | 3e-10   | 74%   | <a href="#">WP_003874565.1</a> |
| thymidylate kinase [Mycobacterium avium]                                                               | 64.3      | 64.3        | 100%        | 3e-10   | 74%   | <a href="#">WP_023864921.1</a> |
| thymidylate kinase [Mycobacterium avium]                                                               | 64.3      | 64.3        | 100%        | 3e-10   | 74%   | <a href="#">WP_023883946.1</a> |
| thymidylate kinase [Mycobacterium avium subsp. hominissuis TH135]                                      | 64.3      | 64.3        | 100%        | 3e-10   | 74%   | <a href="#">BAN32696.1</a>     |
| thymidylate kinase [Mycobacterium indicus pranii]                                                      | 64.3      | 64.3        | 100%        | 3e-10   | 74%   | <a href="#">WP_014942809.1</a> |
| thymidylate kinase [Mycobacterium intracellulare]                                                      | 64.3      | 64.3        | 100%        | 3e-10   | 74%   | <a href="#">WP_009957361.1</a> |
| thymidylate kinase [Mycobacterium avium]                                                               | 64.3      | 64.3        | 100%        | 3e-10   | 74%   | <a href="#">WP_009978739.1</a> |
| thimidylate kinase [Mycobacterium avium subsp. paratuberculosis]                                       | 64.3      | 64.3        | 100%        | 3e-10   | 74%   | <a href="#">AAL10206.1</a>     |
| thymidylate kinase [Mycobacterium genavense]                                                           | 61.7      | 61.7        | 100%        | 2e-09   | 74%   | <a href="#">WP_025737680.1</a> |

| Description                                                       | Max score | Total score | Query cover | E value | Ident | Accession                      |
|-------------------------------------------------------------------|-----------|-------------|-------------|---------|-------|--------------------------------|
| thymidylate kinase [Segniliparus rotundus]                        | 61.3      | 61.3        | 100%        | 3e-09   | 74%   | <a href="#">WP_013139117.1</a> |
| thymidylate kinase [Mycobacterium gastris 'Wayne']                | 61.3      | 61.3        | 100%        | 3e-09   | 70%   | <a href="#">ETW22207.1</a>     |
| thymidylate kinase [Mycobacterium parascrofulaceum]               | 60.9      | 60.9        | 100%        | 4e-09   | 70%   | <a href="#">WP_007168096.1</a> |
| thymidylate kinase [Mycobacterium kansasii]                       | 60.4      | 60.4        | 100%        | 5e-09   | 70%   | <a href="#">WP_023371563.1</a> |
| thymidylate kinase [Mycobacterium intracellulare MIN_061107_1834] | 59.2      | 59.2        | 100%        | 1e-08   | 70%   | <a href="#">ETZ31677.1</a>     |
| thymidylate kinase [Mycobacterium intracellulare MIN_052511_1280] | 59.2      | 59.2        | 100%        | 1e-08   | 70%   | <a href="#">ETZ27386.1</a>     |
| thymidylate kinase [Mycobacterium avium MAV_120809_2495]          | 59.2      | 59.2        | 100%        | 1e-08   | 70%   | <a href="#">ETZ47660.1</a>     |
| thymidylate kinase [Mycobacterium sp. H4Y]                        | 59.2      | 59.2        | 100%        | 1e-08   | 70%   | <a href="#">WP_008259770.1</a> |
| thymidylate kinase [Mycobacterium sp. MOTT36Y]                    | 59.2      | 59.2        | 100%        | 1e-08   | 70%   | <a href="#">WP_014712266.1</a> |
| thymidylate kinase [Mycobacterium intracellulare]                 | 59.2      | 59.2        | 100%        | 1e-08   | 70%   | <a href="#">WP_014385672.1</a> |
| thymidylate kinase [Mycobacterium intracellulare]                 | 59.2      | 59.2        | 100%        | 1e-08   | 70%   | <a href="#">WP_014380959.1</a> |
| thymidylate kinase [Mycobacterium tuberculosis TTK-01-0051]       | 59.2      | 59.2        | 96%         | 1e-08   | 73%   | <a href="#">KBZ68881.1</a>     |
| thymidylate kinase [Mycobacterium colombiense]                    | 59.2      | 59.2        | 96%         | 1e-08   | 73%   | <a href="#">WP_007773133.1</a> |
| thymidylate kinase [Mycobacterium yongonense]                     | 57.5      | 57.5        | 96%         | 5e-08   | 69%   | <a href="#">WP_020823379.1</a> |
| thymidylate kinase [Mycobacterium intracellulare]                 | 55.8      | 55.8        | 100%        | 2e-07   | 67%   | <a href="#">WP_014383184.1</a> |
| thymidylate kinase [Mycobacterium triplex]                        | 54.1      | 54.1        | 100%        | 7e-07   | 67%   | <a href="#">CDO87354.1</a>     |
| thymidylate kinase [Gordonia otitidis]                            | 52.4      | 52.4        | 100%        | 2e-06   | 67%   | <a href="#">WP_007238888.1</a> |
| thymidylate kinase [Segniliparus rugosus]                         | 52.0      | 52.0        | 100%        | 3e-06   | 70%   | <a href="#">WP_007470136.1</a> |
| thymidylate kinase [Turicella otitidis]                           | 51.5      | 51.5        | 96%         | 4e-06   | 65%   | <a href="#">WP_004601034.1</a> |
| thymidylate kinase [Mycobacterium abscessus]                      | 51.5      | 51.5        | 100%        | 4e-06   | 59%   | <a href="#">WP_005117148.1</a> |
| thymidylate kinase [Mycobacterium abscessus]                      | 51.5      | 51.5        | 100%        | 4e-06   | 59%   | <a href="#">WP_005102107.1</a> |
| thymidylate kinase [Mycobacterium abscessus]                      | 51.5      | 51.5        | 100%        | 5e-06   | 59%   | <a href="#">WP_025239600.1</a> |
| thymidylate kinase [Mycobacterium abscessus]                      | 51.5      | 51.5        | 100%        | 5e-06   | 59%   | <a href="#">WP_005088442.1</a> |
| thymidylate kinase [Mycobacterium abscessus]                      | 51.5      | 51.5        | 100%        | 5e-06   | 59%   | <a href="#">WP_005080864.1</a> |
| thymidylate kinase [Mycobacterium abscessus]                      | 51.5      | 51.5        | 100%        | 5e-06   | 59%   | <a href="#">WP_005070201.1</a> |
| thymidylate kinase [Mycobacterium abscessus]                      | 51.5      | 51.5        | 100%        | 5e-06   | 59%   | <a href="#">WP_005056276.1</a> |
| thymidylate kinase [Mycobacterium abscessus]                      | 51.5      | 51.5        | 100%        | 5e-06   | 59%   | <a href="#">WP_005111910.1</a> |
| thymidylate kinase [Rhodococcus sp. UNC23MFCrub1.1]               | 51.1      | 51.1        | 96%         | 6e-06   | 69%   | <a href="#">WP_027506870.1</a> |
| MULTISPECIES: thymidylate kinase [Mycobacterium]                  | 50.7      | 50.7        | 100%        | 9e-06   | 59%   | <a href="#">WP_025088603.1</a> |
| thymidylate kinase [Gordonia sputii]                              | 49.8      | 49.8        | 100%        | 2e-05   | 63%   | <a href="#">WP_005208003.1</a> |
| thymidylate kinase [Mycobacterium abscessus]                      | 49.0      | 49.0        | 100%        | 3e-05   | 59%   | <a href="#">WP_016892938.1</a> |
| thymidylate kinase [Gordonia paraffinivorans]                     | 48.6      | 48.6        | 100%        | 4e-05   | 63%   | <a href="#">WP_006899672.1</a> |
| thymidylate kinase [Corynebacterium halotolerans]                 | 48.1      | 48.1        | 100%        | 6e-05   | 59%   | <a href="#">WP_015400173.1</a> |
| thymidylate kinase [Mycobacterium sp. JDM601]                     | 47.7      | 47.7        | 100%        | 8e-05   | 59%   | <a href="#">WP_013829916.1</a> |
| hypothetical protein [Gordonia kroppenstedtii]                    | 47.7      | 47.7        | 81%         | 8e-05   | 62%   | <a href="#">WP_018180987.1</a> |
| thymidylate kinase [Mycobacterium abscessus]                      | 47.3      | 47.3        | 100%        | 1e-04   | 56%   | <a href="#">WP_005077366.1</a> |
| thymidylate kinase [Mycobacterium leprae]                         | 46.9      | 46.9        | 96%         | 1e-04   | 69%   | <a href="#">WP_010907920.1</a> |
| thymidylate kinase [Gordonia effusa]                              | 46.9      | 46.9        | 100%        | 1e-04   | 63%   | <a href="#">WP_007315852.1</a> |
| thymidylate kinase [Gordonia polyisoprenivorans]                  | 46.9      | 46.9        | 81%         | 1e-04   | 65%   | <a href="#">WP_026919949.1</a> |
| thymidylate kinase [Gordonia polyisoprenivorans]                  | 46.9      | 46.9        | 81%         | 1e-04   | 65%   | <a href="#">WP_006370363.1</a> |
| thymidylate kinase [Dietzia cinnamea]                             | 46.9      | 46.9        | 59%         | 1e-04   | 88%   | <a href="#">WP_007630481.1</a> |
| thymidylate kinase [Tomitella biformata]                          | 46.4      | 46.4        | 100%        | 2e-04   | 64%   | <a href="#">WP_024793529.1</a> |
| thymidylate kinase [Gordonia terrae]                              | 46.4      | 46.4        | 81%         | 2e-04   | 68%   | <a href="#">WP_004023514.1</a> |
| thymidylate kinase [Mycobacterium xenopi 3993]                    | 46.0      | 46.0        | 100%        | 2e-04   | 59%   | <a href="#">EUA32800.1</a>     |
| hypothetical protein [Corynebacterium capitovis]                  | 46.0      | 46.0        | 96%         | 3e-04   | 57%   | <a href="#">WP_018017662.1</a> |
| thymidylate kinase [Mycobacterium avium]                          | 46.0      | 46.0        | 100%        | 3e-04   | 59%   | <a href="#">WP_019737853.1</a> |

| Description                                               | Max score | Total score | Query cover | E value | Ident | Accession                      |
|-----------------------------------------------------------|-----------|-------------|-------------|---------|-------|--------------------------------|
| thymidylate kinase [Mycobacterium xenopi 4042]            | 46.0      | 46.0        | 100%        | 3e-04   | 59%   | <a href="#">EUA06831.1</a>     |
| thymidylate kinase [Mycobacterium xenopi]                 | 46.0      | 46.0        | 100%        | 3e-04   | 59%   | <a href="#">WP_003920064.1</a> |
| thymidylate kinase [Corynebacterium genitalium]           | 45.6      | 45.6        | 88%         | 4e-04   | 67%   | <a href="#">WP_005286098.1</a> |
| hypothetical protein [Corynebacterium doosanense]         | 45.2      | 45.2        | 100%        | 5e-04   | 63%   | <a href="#">WP_018021130.1</a> |
| thymidylate kinase [Corynebacterium tuberculostearicum]   | 45.2      | 45.2        | 100%        | 5e-04   | 59%   | <a href="#">WP_005326584.1</a> |
| thymidylate kinase [Corynebacterium pseudogenitalium]     | 45.2      | 45.2        | 100%        | 5e-04   | 59%   | <a href="#">WP_005322408.1</a> |
| thymidylate kinase [Rhodococcus pyridinivorans]           | 45.2      | 45.2        | 100%        | 5e-04   | 59%   | <a href="#">WP_006550215.1</a> |
| hypothetical protein [Corynebacterium lubricantis]        | 44.8      | 44.8        | 92%         | 7e-04   | 62%   | <a href="#">WP_018296139.1</a> |
| MULTISPECIES: thymidylate kinase [Corynebacterium]        | 44.8      | 44.8        | 100%        | 7e-04   | 59%   | <a href="#">WP_023020774.1</a> |
| thymidylate kinase [Mycobacterium neoaurum]               | 44.8      | 44.8        | 100%        | 7e-04   | 59%   | <a href="#">WP_030134849.1</a> |
| thymidylate kinase [Gordonia bronchialis]                 | 44.8      | 44.8        | 92%         | 7e-04   | 60%   | <a href="#">WP_012835337.1</a> |
| hypothetical protein [Smaragdicooccus niigatensis]        | 44.8      | 44.8        | 96%         | 7e-04   | 58%   | <a href="#">WP_018163288.1</a> |
| thymidylate kinase [Gordonia solii]                       | 44.3      | 44.3        | 85%         | 0.001   | 59%   | <a href="#">WP_007617234.1</a> |
| thymidylate kinase [Corynebacterium urealyticum]          | 44.3      | 44.3        | 100%        | 0.001   | 56%   | <a href="#">WP_015381340.1</a> |
| thymidylate kinase [Corynebacterium urealyticum]          | 44.3      | 44.3        | 100%        | 0.001   | 56%   | <a href="#">WP_012359732.1</a> |
| thymidylate kinase [Mycobacterium aromaticivorans JS19b1] | 43.9      | 43.9        | 100%        | 0.001   | 59%   | <a href="#">KDE98580.1</a>     |
| hypothetical protein [Corynebacterium pyruviciproducens]  | 43.5      | 43.5        | 100%        | 0.002   | 59%   | <a href="#">WP_016458814.1</a> |
| thymidylate kinase [Dietzia sp. UCD-THP]                  | 43.5      | 43.5        | 92%         | 0.002   | 67%   | <a href="#">WP_017836632.1</a> |

## Alignments

thymidylate kinase Tmk, partial [Mycobacterium tuberculosis UT0124]

Sequence ID: [gb|KBM28427.1](#) | Length: 90 | Number of Matches: 1

Range 1: 24 to 50

| Score          | Expect  | Method | Identities  | Positives   | Gaps     | Frame |
|----------------|---------|--------|-------------|-------------|----------|-------|
| 90.1 bits(205) | 5e-20() |        | 27/27(100%) | 27/27(100%) | 0/27(0%) |       |

Features:

```
Query 1  ERSRGRAQRDPGRARDNYERDAELQQR 27
          ERSRGRAQRDPGRARDNYERDAELQQR
Sbjct 24  ERSRGRAQRDPGRARDNYERDAELQQR 50
```

thymidylate kinase, partial [Mycobacterium tuberculosis]

Sequence ID: [gb|AIH62975.1](#) | Length: 171 | Number of Matches: 1

Range 1: 105 to 131

| Score          | Expect  | Method | Identities  | Positives   | Gaps     | Frame |
|----------------|---------|--------|-------------|-------------|----------|-------|
| 90.1 bits(205) | 3e-19() |        | 27/27(100%) | 27/27(100%) | 0/27(0%) |       |

Features:

```
Query 1  ERSRGRAQRDPGRARDNYERDAELQQR 27
          ERSRGRAQRDPGRARDNYERDAELQQR
Sbjct 105 ERSRGRAQRDPGRARDNYERDAELQQR 131
```

thymidylate kinase, partial [Mycobacterium tuberculosis]

Sequence ID: [gb|AIH98343.1](#) | Length: 175 | Number of Matches: 1

Range 1: 109 to 135

| Score          | Expect  | Method | Identities  | Positives   | Gaps     | Frame |
|----------------|---------|--------|-------------|-------------|----------|-------|
| 90.1 bits(205) | 3e-19() |        | 27/27(100%) | 27/27(100%) | 0/27(0%) |       |

Features:

```
Query 1  ERSRGRAQRDPGRARDNYERDAELQQR 27
```

Sbjct 109 ERSRGRAQRDPGRARDNYERDAELQQR  
ERSRGRAQRDPGRARDNYERDAELQQR 135

thymidylate kinase, partial [Mycobacterium bovis]

Sequence ID: **ref|WP\_024459054.1** Length: 210 Number of Matches: 1

Range 1: 144 to 170

| Score          | Expect  | Method | Identities  | Positives   | Gaps     | Frame |
|----------------|---------|--------|-------------|-------------|----------|-------|
| 90.1 bits(205) | 3e-19() |        | 27/27(100%) | 27/27(100%) | 0/27(0%) |       |

Features:

Query 1 ERSRGRAQRDPGRARDNYERDAELQQR 27  
ERSRGRAQRDPGRARDNYERDAELQQR  
Sbjct 144 ERSRGRAQRDPGRARDNYERDAELQQR 170

thymidylate kinase [Mycobacterium tuberculosis]

Sequence ID: **gb|AIH23782.1** Length: 214 Number of Matches: 1

Range 1: 148 to 174

| Score          | Expect  | Method | Identities  | Positives   | Gaps     | Frame |
|----------------|---------|--------|-------------|-------------|----------|-------|
| 90.1 bits(205) | 4e-19() |        | 27/27(100%) | 27/27(100%) | 0/27(0%) |       |

Features:

Query 1 ERSRGRAQRDPGRARDNYERDAELQQR 27  
ERSRGRAQRDPGRARDNYERDAELQQR  
Sbjct 148 ERSRGRAQRDPGRARDNYERDAELQQR 174
